# Supplementary material for: Fundamentals for Future Mobile-Health (mHealth): A Systematic Review of Mobile Phone and Web-Based Text Messaging in Mental Health
Source: PubMed Central journal article supplement (PMC4920962; doi:10.2196/jmir.5066), 2016-06-10
Supplement: jmir_v18i6e135_app1.pdf [file jmir_v18i6e135_app1.pdf]

## Multimedia Appendix 1: Technical features of text-messaging procedure

| Authors (year)                 | Sending procedure        | Communication features | Self-monitoring          | Content of messages                              | Frequency, duration of messaging       |
|--------------------------------|--------------------------|------------------------|--------------------------|--------------------------------------------------|----------------------------------------|
| Suffoletto (2011)              | Web-based                | Two-way                | Custom                   | Identical                                        | Weekly, 12 weeks                       |
| Stoner et al. (2012)           | Web-based                | One-way                | No                       | Identical                                        | Daily, 8 weeks                         |
| Haug et al. (2013)             | Web-based                | Two-way                | Custom                   | Tailored                                         | Daily to weekly, 12 weeks              |
| Keoleian et al. (2013)         | Web-based                | Two-way                | No                       | Personalized                                     | Daily, 23 days                         |
| Mason et al. (2013)            | Web-based                | Two-way                | Custom                   | Personalized                                     | 3 to 4 messages a day                  |
| Rios-Bedoya et al. (2013)      | Web-based                | Two-way                | Text-messaging survey    | Standard                                         | Two surveys                            |
| Bendsten et al. (2014)         | Web-based                | Two-way                | Custom                   | Identical                                        | Four days a week, 4 weeks              |
| Lucht et al. (2014)            | Web-based                | Two-way                | Custom                   | Personalized (nominative)                        | 2 messages per week, 8 weeks           |
| Moore et al. (2014)            | Telephone sending        | Two-way                | Relevant scale           | Identical                                        | Daily                                  |
| Rachel Gonzales et al. (2014)  | Web-based                | Two-way                | Custom                   | Individualized, tailored                         | Daily, 12 weeks                        |
| Suffoletto et al. (2014)       | Web-based                | Two-way                | Custom                   | Individualized                                   | Twice a week, 12 weeks                 |
| Pijenburg et al. (2010)        | Web-based                | One-way                | No                       | Personalized according to patient's goals        | Depending on patient's wishes, 7 weeks |
| Depp et al. (2010)             | Web-based                | Two-way                | Custom                   | Standard initially, based upon patient responses | 6 days a week, 12 weeks                |
| Granholt et al. (2012)         | Web-based,               | Two-way                | Multiple-choice protocol | Personalized based on patient response           | 6 days a week, 12 weeks                |
| Maritta Välimäki et al. (2012) | Semi-automated web-based | One-way                | None                     | Custom                                           | Custom frequency, 12 months            |
| Montes et al. (2012)           | Web-based                | One-way                | None                     | Standard                                         | Daily reminders, 3 months              |
| Ainsworth et al. (2013)        | Web-based                | Two-way                | Custom                   | Standard                                         | Daily, 3 weeks                         |
| Bebee et al. (2014)            | Web-based                | Two-way                | Custom multiple choice   | Daily text messages for EMA                      | Daily, 3 months                        |
| Ben-Zeev et al. (2014)         | Telephone sending        | Two-way                | Custom                   | Both identical and personalized                  | 3 messages a day for 12 weeks          |
| Van den Berg et al. (2011)     | Web-based                | Two-way                | Custom                   | Standard                                         | Weekly, 6 months                       |

|                           |                              |         |                                |                                     |                                                                       |
|---------------------------|------------------------------|---------|--------------------------------|-------------------------------------|-----------------------------------------------------------------------|
| Bopp et al. (2010)        | Web-based                    | Two-way | Relevant scale                 | Altman Self-Rating Mania Scale      | Weekly, 36 weeks                                                      |
| Agyapong (2013)           | Web-based                    | One-way | No                             | Standard among 10 possible messages | Twice daily, 3 months                                                 |
| Agyapong (2012)           | Web-based                    | One-way | No                             | Identical                           | Daily, 3 month                                                        |
| Aguilera et al. (2011)    | Manual and automated sending | One-way | None                           | Standard and custom                 | Daily                                                                 |
| Aguilera et al. (2014)    | Manual and automated         | One-way | None                           | Standard and custom                 | Daily                                                                 |
| Chandra et al. (2014).    | Telephone sending            | One-way | None                           | Identical                           | Daily, one month                                                      |
| Kunigiri et al. (2014).   | Telephone sending            | One-way | None                           | Standard                            | Evening before appointment                                            |
| Branson CE et al. (2013). | Web-based                    | One-way | None                           | Standard                            | Two days before appointment                                           |
| Price et al. (2014).      | Web-based                    | One-way | Custom                         | Standard                            | Daily, 15 days                                                        |
| Furber et al. (2014)      | Web-based                    | One-way | Custom                         | Customized                          | Schedule decided on day-to-day basis                                  |
| Chen et al. (2011)        | Telephone sending            | Two-way | None                           | Standard                            | Once a week, 4 weeks                                                  |
| Berrouigut et al. (2014)  | Web-based                    | One-way | None                           | Personalized                        | After discharge: 48 hours, then weekly for one month                  |
| Berrouiguet et al. (2014) | Web-based                    | One-way | None                           | Personalized                        | After discharge: 48 hours, then monthly for 5 months (total 6 months) |
| Robinson et al. (2006)    | Web-based                    | Two-way | Custom                         | Customized messages                 | Weekly, Six months                                                    |
| Shapiro et al. (2010)     | Web-based                    | Two-way | Custom Likert-based assessment | Daily feedback message among 100    | Daily, 12 weeks                                                       |
| Lucht et al. (2014)       | Web-based                    | Two-way | Custom                         | Tailored messages                   | Weekly, 16 week                                                       |
